# Supplementary material for: Development of a Clinically Applicable NanoString-Based Gene Expression Classifier for Muscle-Invasive Bladder Cancer Molecular Stratification
Source: MDPI journal article supplement (doi:10.3390/cancers14194911), 2022-10-07
Supplement: s1 [file s1]

## Supplementary Tables

**Table S1.** Clinicopathologic characteristics of Cohorts I and II.

|                                | <b>Total<br/>(N = 138)</b> | <b>Cohort I<br/>(n=72)</b> | <b>Cohort II<br/>(n=66)</b> | <b>p -Value</b> |
|--------------------------------|----------------------------|----------------------------|-----------------------------|-----------------|
| Age (years)                    |                            |                            |                             | 0.098           |
| Mean (Range)                   | 72.1 (33-90)               | 70.6 (33-88)               | 73.6 (49-90)                |                 |
| <b>Sex</b>                     |                            |                            |                             | 0.585           |
| Male                           | 103 (75)                   | 52 (73)                    | 51 (77)                     |                 |
| Female                         | 34 (25)                    | 19 (27)                    | 15 (23)                     |                 |
| <b>CIS</b>                     |                            |                            |                             | 0.994           |
| Present                        | 56 (41)                    | 29 (41)                    | 27 (41)                     |                 |
| Absent                         | 81 (59)                    | 42 (59)                    | 39 (59)                     |                 |
| <b>pT Category</b>             |                            |                            |                             | 0.742           |
| pT2                            | 14 (10)                    | 6 (9)                      | 8 (12)                      |                 |
| pT3                            | 81 (59)                    | 42 (59)                    | 39 (59)                     |                 |
| pT4                            | 42 (31)                    | 23 (32)                    | 19 (29)                     |                 |
| <b>Margins</b>                 |                            |                            |                             | 0.466           |
| Negative                       | 102 (74)                   | 51 (71)                    | 51 (77)                     |                 |
| Positive                       | 35 (25)                    | 20 (28)                    | 15 (23)                     |                 |
| N/A                            | 1 (1)                      | 1 (1)                      |                             |                 |
| <b>Lymphovascular invasion</b> |                            |                            |                             | 0.393           |
| Absent                         | 40 (29)                    | 23 (32)                    | 17 (26)                     |                 |
| Present                        | 97 (70)                    | 48 (67)                    | 49 (74)                     |                 |
| N/A                            | 1 (1)                      | 1 (1)                      |                             |                 |
| <b>Lymph Nodes</b>             |                            |                            |                             | 0.161           |
| Negative                       | 40 (63)                    | 41 (57)                    | 46 (70)                     |                 |
| Positive                       | 98 (33)                    | 27 (38)                    | 18 (27)                     |                 |
| N/A                            | 6 (4)                      | 4 (6)                      | 2 (3)                       |                 |
| <b>Event-free survival</b>     |                            |                            |                             | 0.046           |
| Relapse                        | 56 (41)                    | 39 (54)                    | 17 (24)                     |                 |
| No Relapse                     | 62 (45)                    | 32 (44)                    | 30 (42)                     |                 |
| N/A                            | 20 (14)                    | 1 (1)                      | 19 (26)                     |                 |
| <b>Death</b>                   |                            |                            |                             | 0.510           |
| No Death                       | 41 (30)                    | 25 (35)                    | 16 (24)                     |                 |
| N/A                            | 84 (61)                    | 46 (64)                    | 38 (58)                     |                 |
| N/A                            | 13 (9)                     | 1 (1)                      | 12 (18)                     |                 |
| <b>Follow-up time (months)</b> |                            |                            |                             |                 |
| Relapse                        |                            |                            |                             |                 |
| Mean (Range)                   | 30.2 (0-216)               | 30.6 (0-206)               | 29.5 (0-216)                | 0.902           |
| Death                          |                            |                            |                             |                 |
| Mean (Range)                   | 27.6 (0-216)               | 32.2 (0-206)               | 22.5 (0-216)                | 0.183           |

CIS, Carcinoma In Situ; pT, Pathologic T category; N/A, not available.

Note: The patients in this study did not receive any chemotherapy or checkpoint inhibitor therapy prior to their cystectomy. Postoperative chemotherapy was given in 32 patients and postoperative immune checkpoint therapy in 3 patients.

**Table S2.** Genes used in NanoString-based gene expression profiling ( $n=62$ ).

| Gene name  | Reference                          |
|------------|------------------------------------|
| THY1       | [15], [20]                         |
| STAT3      | [15], [38]*                        |
| JAK2       | [15]                               |
| KRT15      | [15], [39]*                        |
| EGFR       | [11], [15], [16]                   |
| ITGA6      | [15]                               |
| KRT14      | [10], [12], [14], [15], [16]       |
| KRT5       | [10], [11], [12], [14], [15], [16] |
| KRT17      | [9], [15]                          |
| CD44       | [10], [11], [12], [14], [15]       |
| UPK1B      | [15], [16]                         |
| UPK1A      | [14], [15], [16], [20], [30]       |
| UPK3A      | [15], [16]                         |
| UPK2       | [9], [30], [14], [15], [16], [30]  |
| UPK3B      | [15]                               |
| KRT20      | [10], [12], [14], [15], [16], [20] |
| KRT18      | [10], [12], [15]                   |
| KRT8       | [10], [15]                         |
| PWRN1      | [32]                               |
| PWRN3      | [32]                               |
| GSTM5      | [32]                               |
| GSTM4      | [32]                               |
| GSTM2      | [32]                               |
| ZNF320     | [32]                               |
| FGFR3      | [14]                               |
| ZNF66      | [32]                               |
| ZNF737     | [32]                               |
| FOXA1      | [32], [10], [12], [11], [14], [16] |
| AC017081.2 | [32]                               |
| ACER2      | [32]                               |
| SEMA5A     | [9], [20], [30], [32]              |
|            | [9], [10], [14], [16], [20], [30], |
| PPARG      | [32]                               |
| GATA3      | [9], [10], [16], [30], [32]        |
| SNX31      | [14], [20], [30], [32]             |
| TM4SF19    | [32]                               |
| SERPINB13  | [20], [32]                         |
| SERPINB3   | [20], [32]                         |
| SERPINB4   | [20], [32]                         |
| SPRR2F     | [32]                               |
| SPRR2E     | [32]                               |
| SPRR2A     | [32]                               |
| SPRR2D     | [32]                               |

|          |                              |
|----------|------------------------------|
| KRT16    | [10], [20], [32]             |
| DSG3     | [20], [32]                   |
| KRT6C    | [10], [32]                   |
| KRT6A    | [10], [14], [20], [32]       |
| KRT6B    | [10], [11], [20], [30], [32] |
| PLEKHG4B | [14], [32]                   |
| GNG4     | [14], [32]                   |
| PEG10    | [14], [32]                   |
| SOX2     | [14], [32]                   |
| TUBB2B   | [14], [32]                   |
| CHGB     | [32]                         |
| SYP      | [16], [32]                   |
| ENO2     | [16], [32]                   |
| SV2A     | [32]                         |
| MSI1     | [14], [32]                   |
| RND2     | [14], [32]                   |
| APLP1    | [14], [32]                   |
| CDKN2A   | [16], Internal work          |
| RB1      | [16], Internal work          |
| TP53     | [12], Internal work          |

---

38\*. Mo, Q.; Li R.; Adeegbe DO.; Peng G.; Chan KS. Integrative multi-omics analysis of muscle-invasive bladder cancer identifies prognostic biomarkers for frontline chemotherapy and immunotherapy. *Commun Biol* **2020**, 3,784.

39\*. Eich, ML.; Dyrskjöt ,L.; Netto, GJ. Toward personalized management in bladder cancer: the promise of novel molecular taxonomy. *Virchows Arch* **2017**, 471, 271-280.

**Table S3.** List of 18 differentially expressed genes between basal and luminal tumors according to NanoString-based gene expression hierarchical clustering and 5 neuronal genes used in the study to help define potential neuroendocrine muscle invasive bladder cancers.

| Gene      | FDR(BH) | Fold Change | Upregulated In |
|-----------|---------|-------------|----------------|
| KRT5      | 0.001   | 5.6         | Basal          |
| KRT6C     | 0.001   | 5.2         | Basal          |
| DSG3      | 0.001   | 3.5         | Basal          |
| KRT16     | 0.001   | 2.9         | Basal          |
| KRT14     | 0.002   | 4.4         | Basal          |
| KRT17     | 0.006   | 2.1         | Basal          |
| SERPINB13 | 0.007   | 2.4         | Basal          |
| SPRR2A    | 0.012   | 2.3         | Basal          |
| SPRR2D    | 0.014   | 2.3         | Basal          |
| UPK2      | 0.001   | 4.8         | Luminal        |
| UPK1A     | 0.001   | 4.4         | Luminal        |
| UPK3A     | 0.001   | 3.8         | Luminal        |
| KRT20     | 0.001   | 3.6         | Luminal        |
| GATA3     | 0.001   | 3.4         | Luminal        |
| ACER2     | 0.001   | 2.7         | Luminal        |
| SNX31     | 0.001   | 2.1         | Luminal        |
| UPK1B     | 0.012   | 2.9         | Luminal        |
| FOXA1     | 0.013   | 2.0         | Luminal        |
| SOX2*     | 0.302   | 1.1         |                |
| GNG4*     | 0.977   | 0.1         |                |
| APLP1*    | 0.993   | 0.0         |                |
| SV2A*     | 0.993   | 0.0         |                |
| PEG10*    | 0.211   | 0.9         |                |

\* Neuronal genes
